# Supplementary material for: Sarcomatoid carcinoma presenting as cancers of unknown primary: a clinicopathological portrait
Source: PubMed Central journal article supplement (PMC6796453; doi:10.1186/s12885-019-6155-6), 2019-10-17
Supplement: 12885_2019_6155_MOESM1_ESM.pdf [file 12885_2019_6155_MOESM1_ESM.pdf]

## Additional File 1

### Nomenclature for Sarcomatoid Carcinoma

|                                                           |
|-----------------------------------------------------------|
| Sarcomatoid malignant neoplasm                            |
| Pleomorphic sarcomatoid malignant neoplasm                |
| High grade or poorly differentiated carcinoma             |
| Poorly differentiated carcinoma with sarcomatoid features |
| Unclassified spindle cell sarcomatoid neoplasm            |
| Malignant neoplasm favor sarcoma                          |
| Sarcomatoid malignant neoplasm favor anaplastic carcinoma |
| Carcinosarcoma                                            |
| High grade epithelioid neoplasm                           |
| Malignant spindle cell and epithelioid neoplasm           |
