# Supplementary material for: Sarcomatoid carcinoma presenting as cancers of unknown primary: a clinicopathological portrait
Source: PubMed Central journal article supplement (PMC6796453; doi:10.1186/s12885-019-6155-6), 2019-10-17
Supplement: 12885_2019_6155_MOESM2_ESM.pdf [file 12885_2019_6155_MOESM2_ESM.pdf]

## Additional File 2

### Response to First Line Chemotherapy

| Patient | Chemotherapy              | Best Response | Time to Progression                                             |
|---------|---------------------------|---------------|-----------------------------------------------------------------|
| 1       | Gemcitabine + Docetaxel   | PD            | 2 months                                                        |
| 2       | Gemcitabine + Docetaxel   | PD            | 2 months                                                        |
| 3       | Gemcitabine + Cisplatin   | PD            | 2 months                                                        |
| 4       | Carboplatin + Paclitaxel  | PD            | 2 months                                                        |
| 5       | Gemcitabine + Docetaxel   | PD            | 2 months                                                        |
| 6       | Gemcitabine + Docetaxel   | PD            | 2 months                                                        |
| 7       | Carboplatin + Docetaxel   | DR            | Did not have progression.<br>Underwent consolidative radiation. |
| 8       | Carboplatin + Etoposide   | PD            | 2 months                                                        |
| 9       | Carboplatin + Paclitaxel  | DR            | Did not have progression.<br>Underwent consolidative radiation  |
| 10      | Gemcitabine + Docetaxel   | PD            | 1 month                                                         |
| 11      | Gemcitabine + Carboplatin | DR            | 10 months                                                       |
| 12      | Sunitinib                 | PD            | 1.5 months                                                      |
| 13      | Doxorubicin + Ifosfamide  | PD            | 2 months                                                        |

*Abbreviations:* PD, Progressive disease; DR, Disease regression
